# Supplementary material for: CD244 expression represents functional decline of murine hematopoietic stem cells after in vitro culture
Source: PubMed Central journal article supplement — iScience. 2021 Dec 10;25(1):103603. doi: 10.1016/j.isci.2021.103603 (PMC8718822; doi:10.1016/j.isci.2021.103603), 2021-12-10
Supplement: mmc1.pdf [file mmc1.pdf]

iScience, Volume 25

## Supplemental information

**CD244 expression represents  
functional decline of murine hematopoietic  
stem cells after *in vitro* culture**

**Shuhei Koide, Valgardur Sigurdsson, Visnja Radulovic, Kiyoka Saito, Zhiqian Zheng, Stefan Lang, Shamit Soneji, Atsushi Iwama, and Kenichi Miharada**

## Supplementary Figure 1

A

Young mice  
(10 weeks)

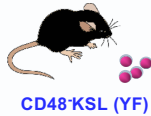

CD48<sup>+</sup>KSL (YF)

Aged mice  
(18 months)

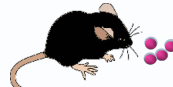

CD48<sup>+</sup>KSL (AF)

B

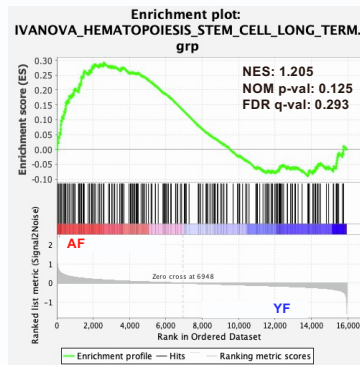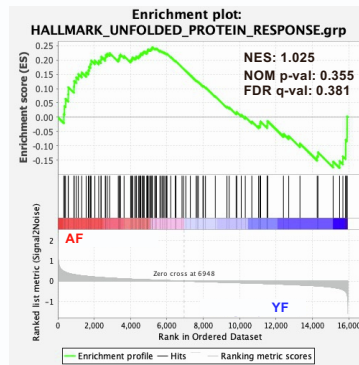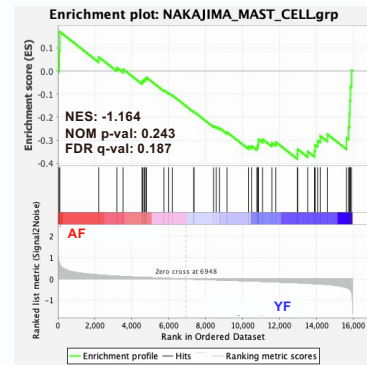

## Supplementary Figure 1. HSC, UPR and mast cell signatures in aged HSC (Related to Figure 2)

(A and B) GSEA of the microarray data comparing young vs aged HSC. Five-hundred (500) CD48-KSL cells were sorted from BM of young (10 weeks old, YF) or aged (18 months old, AF) mice. Sorted cells were subjected to microarray analysis. NES: normalized enrichment score, NOM p-val: nominal p-value, FDR q-val: false discovery rate q-value.

## Supplementary Figure 2

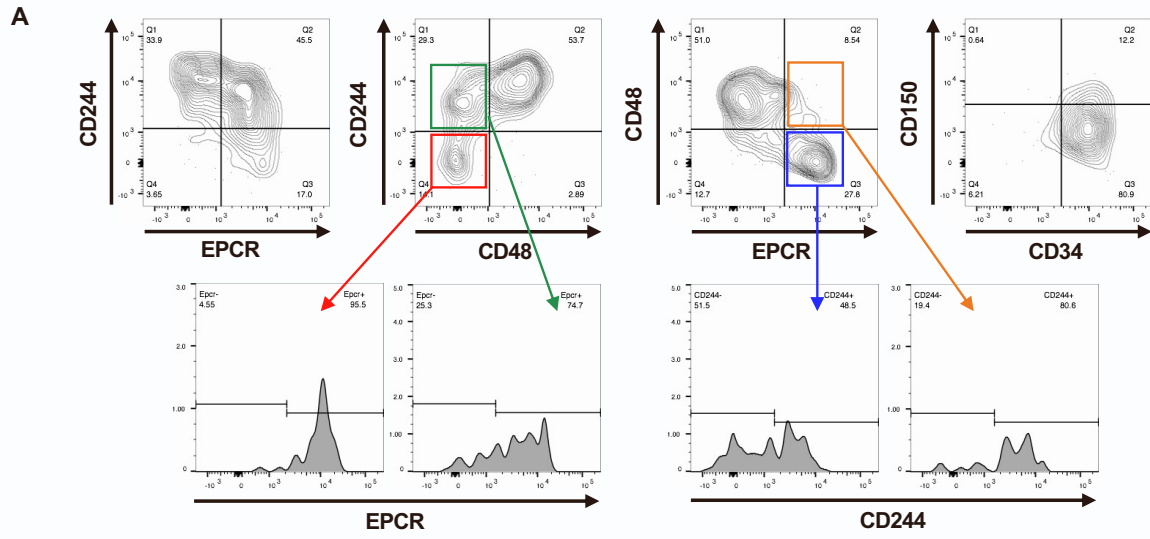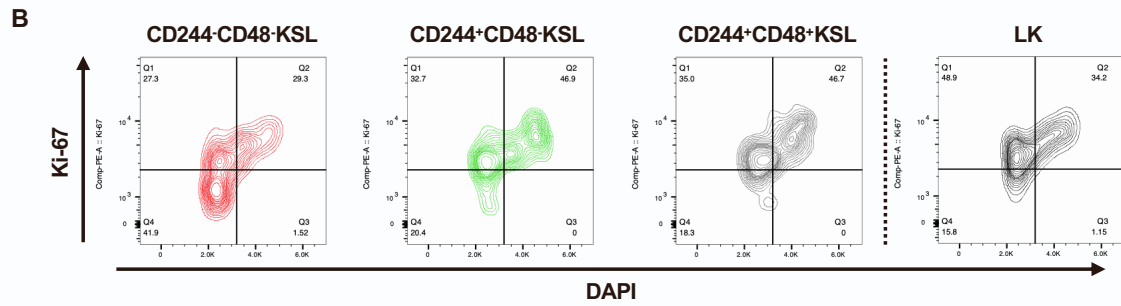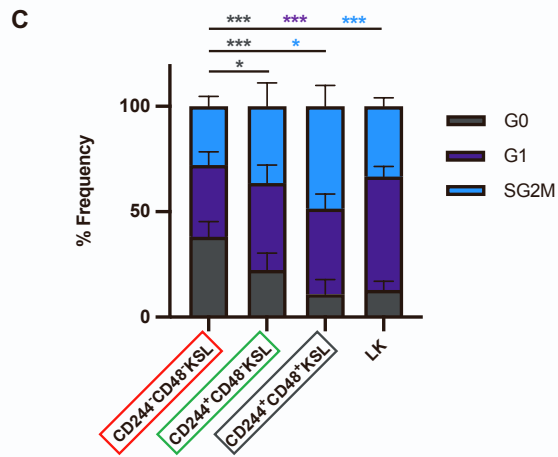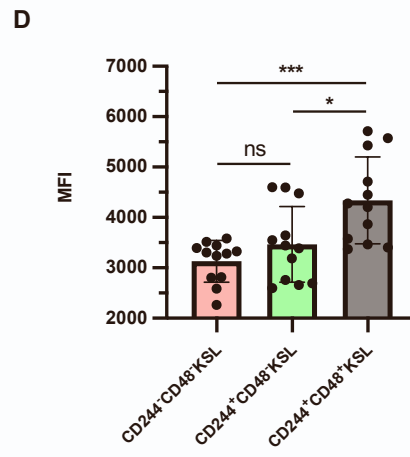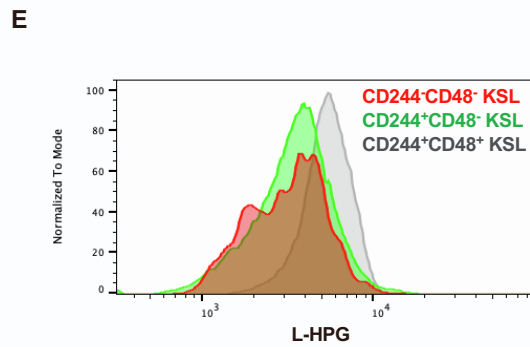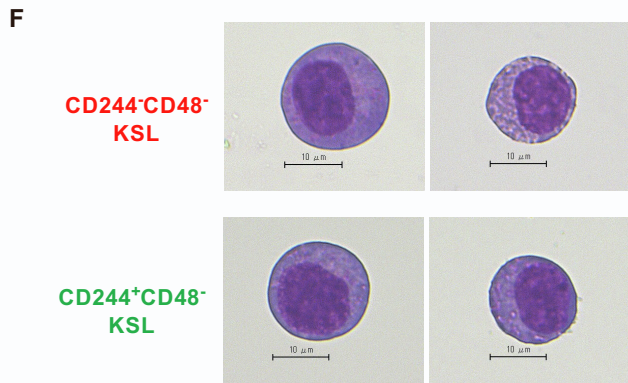

**Supplementary Figure 2. Expression patterns of CD244, cell cycle and protein synthesis rate of cultured HSCs (Related to Figure 3)**

(A) Expression patterns of CD244, EPCR, CD48, CD150 and CD34 on the cell surface of KSL cells after *in vitro* culture in the conventional condition. Representative FACS plots are shown. (B) Cell cycle analysis of CD244<sup>+</sup>HSC. CD150<sup>+</sup>CD48<sup>-</sup>CD244<sup>+</sup>KSL cells cultured for 7 days were stained with cell surface markers, fixed, and then stained with Ki-67 and DAPI. A representative FACS plots on KSL population are shown. (C) Summary of the cell cycle assay. \* $p < 0.05$ , \*\*\* $p < 0.001$ . The color of asterisks represents different cell cycle phase. (D-E) Protein synthesis rate was measured with incorporation of L-HPG in cultured HSCs. Assay was performed on day 7 of culture with standard culture conditions. MFI (D) and representative histogram (E) of L-HPG staining in different populations are shown. \* $p < 0.05$ , \*\*\* $p < 0.001$ . ns: not significant. (F) Morphology of CD244<sup>-</sup>CD48<sup>-</sup>KSL cells and CD244<sup>+</sup>CD48<sup>-</sup>KSL cells. The scale indicates 10  $\mu\text{m}$ .

### Supplementary Figure 3

| Total | KSL   | CD48+<br>CD244+ | CD48-<br>CD244+ | CD48-<br>CD244- | mSCF<br>(ng/ml) | hTPO<br>(ng/ml) |
|-------|-------|-----------------|-----------------|-----------------|-----------------|-----------------|
| -0.82 | -1.04 | -0.74           | -0.96           | -1.36           | 1               | 1               |
| -0.80 | -0.97 | -0.74           | -0.90           | -1.25           | 1               | 10              |
| -0.72 | -0.61 | -0.58           | -0.68           | -0.31           | 1               | 50              |
| -0.77 | -0.68 | -0.59           | -0.68           | -0.64           | 1               | 100             |
| -0.80 | -0.99 | -0.74           | -0.94           | -1.19           | 10              | 1               |
| -0.68 | -0.63 | -0.71           | -0.69           | -0.28           | 10              | 10              |
| -0.19 | 0.23  | 0.13            | -0.03           | 1.13            | 10              | 50              |
| -0.11 | 0.49  | 0.64            | 0.31            | 0.96            | 10              | 100             |
| -0.71 | -0.86 | -0.74           | -0.82           | -0.95           | 50              | 1               |
| -0.15 | -0.22 | -0.61           | -0.21           | -0.01           | 50              | 10              |
| 0.73  | 0.93  | 0.29            | 0.98            | 1.01            | 50              | 50              |
| 1.50  | 1.71  | 2.03            | 1.68            | 1.49            | 50              | 100             |
| -0.70 | -0.86 | -0.74           | -0.80           | -1.02           | 100             | 1               |
| 0.12  | 0.06  | -0.26           | 0.10            | 0.06            | 100             | 10              |
| 1.75  | 1.32  | 0.85            | 1.52            | 0.76            | 100             | 50              |
| 2.35  | 2.10  | 2.51            | 2.10            | 1.61            | 100             | 100             |

### Supplementary Figure 3. ER stress induction and cytokine signals affect CD244 expression (Related to Figure 4)

A heatmap showing frequencies of different populations after 7 days culture with various cytokine concentrations. Mean values of z-score (n=3) in each fraction are displayed.

### Supplementary Figure 4

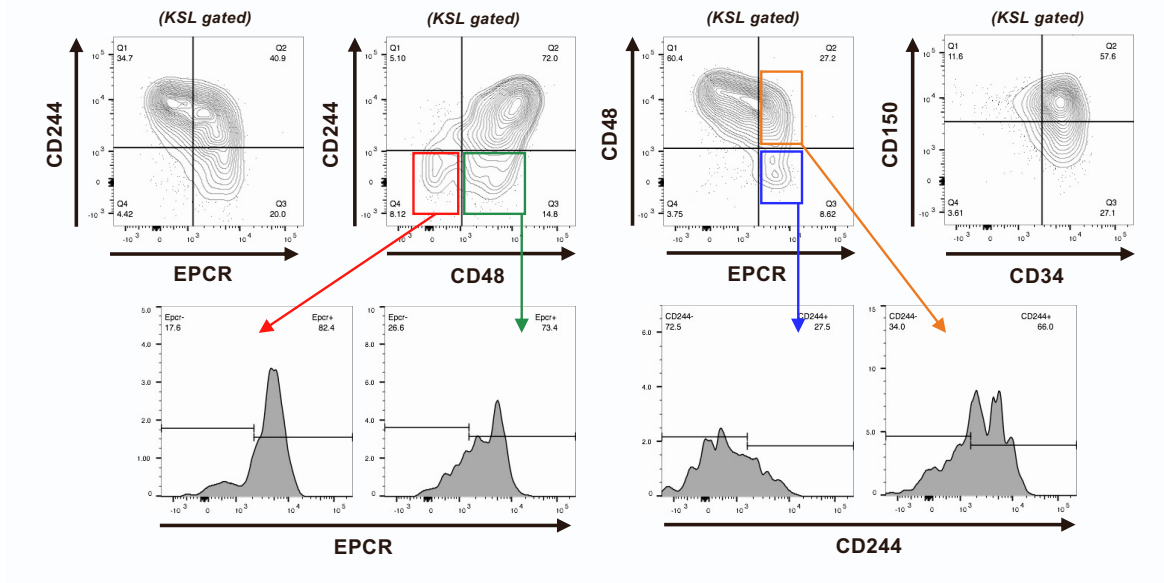

### Supplementary Figure 4. Expression of HSC markers after *in vitro* culture in PVA medium (Related to Figure 6)

Representative expression patterns of CD244, EPCR, CD48, CD150 and CD34 on the cell surface of KSL cells after *in vitro* culture in the PVA medium. Representative FACS plots are shown.
